# Supplementary material
Source: Springer Nature journal article supplement (https://www.springermedizin.de/resource/supplementary/12943_2011_998_MOESM5_ESM.PDF/9552040)
Supplement: MOESM5 [file 9552040]

**Additional file 5:**

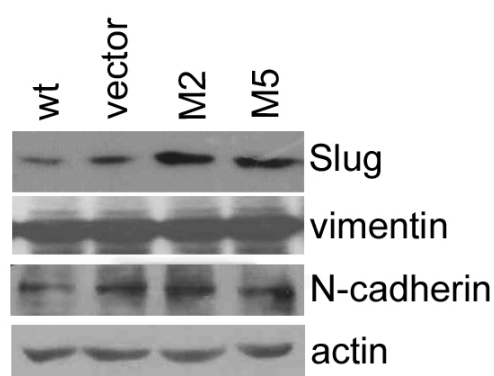

**Figure S5. c-Myb upregulates Slug in MDA-MB-231MYBup cells.** The nontransfected (wt), the *myb*-less vector-transfected (vector) and MYBup (M2, M5) cells were harvested. Protein extracts were resolved by SDS-PAGE and analyzed by immunoblotting with anti-Slug (9585, Cell Signaling), anti-vimentin (13.2, Sigma) and anti-N-cadherin (610920, BD Biosciences) antibodies. To control for sample loading, the blots were probed with the  $\beta$ -actin-specific antibody.
